# Supplementary material
Source: MDPI journal article supplement (https://www.mdpi.com/2227-9040/9/5/115)
Supplement: s1 [file s1 › chemosensors-1184450-supplementary.pdf]

*Supplementary Material*

# **A Hairpin DNA-Based Piezoelectric E-Nose: Exploring the Performances of Heptamer Loops for the Detection of Volatile Organic Compounds**

**Sara Gaggiotti <sup>1</sup>, Marcello Mascini <sup>2,3,\*</sup>, Angelo Cichelli <sup>1</sup>, Michele Del Carlo <sup>2</sup> and Dario Compagnone <sup>2,\*</sup>**

<sup>1</sup> Department of Medical, Oral and Biotechnological Sciences, “G. d’Annunzio” University Chieti-Pescara, Via dei Vestini 31, 66100 Chieti, Italy; sgaggiotti@unite.it (S.G.); acichelli@unich.it (A.C.)

<sup>2</sup> Faculty of Bioscience and Technology for Food, Agriculture and Environment, University of Teramo, 64100 Teramo, Italy; mdelcarlo@unite.it

<sup>3</sup> Department of Analytical Chemistry, Faculty of Chemistry, University Complutense of Madrid, Ciudad Universitaria s/n, 28040 Madrid, Spain

\* Correspondence: mmascini@unite.it (M.M.); dcompagnone@unite.it (D.C.)

| <b>A</b>                                       | <b>Alcohols</b> | <b>Aldehydes</b> | <b>Esters</b> | <b>Hydrocarbons</b> | <b>Ketones</b> |
|------------------------------------------------|-----------------|------------------|---------------|---------------------|----------------|
| <b>ssDNA pentamer binding score (Kcal/mol)</b> |                 |                  |               |                     |                |
| <b>Max</b>                                     | -2.39           | -1.55            | -1.58         | -1.63               | -1.24          |
| <b>Min</b>                                     | -4.78           | -3.89            | -4.00         | -4.43               | -3.16          |
| <b>Median</b>                                  | -3.74           | -2.87            | -2.88         | -3.09               | -2.21          |
| <b>Average</b>                                 | -3.75           | -2.91            | -2.92         | -3.11               | -2.24          |
| <b>ssDNA hexamer binding score (Kcal/mol)</b>  |                 |                  |               |                     |                |
| <b>Max</b>                                     | -2.47           | -1.64            | -1.68         | -1.62               | -1.22          |
| <b>Min</b>                                     | -5.55           | -4.69            | -4.77         | -5.35               | -3.96          |
| <b>Median</b>                                  | -4.12           | -3.21            | -3.23         | -3.45               | -2.45          |
| <b>Average</b>                                 | -4.07           | -3.17            | -3.19         | -3.40               | -2.42          |
| <b>ssDNA heptamer binding score (Kcal/mol)</b> |                 |                  |               |                     |                |
| <b>Max</b>                                     | -2.44           | -1.83            | -1.84         | -1.84               | -1.18          |
| <b>Min</b>                                     | -6.59           | -5.34            | -5.24         | -5.99               | -4.25          |
| <b>Median</b>                                  | -4.36           | -3.41            | -3.41         | -3.71               | -2.62          |
| <b>Average</b>                                 | -4.34           | -3.41            | -3.41         | -3.68               | -2.62          |

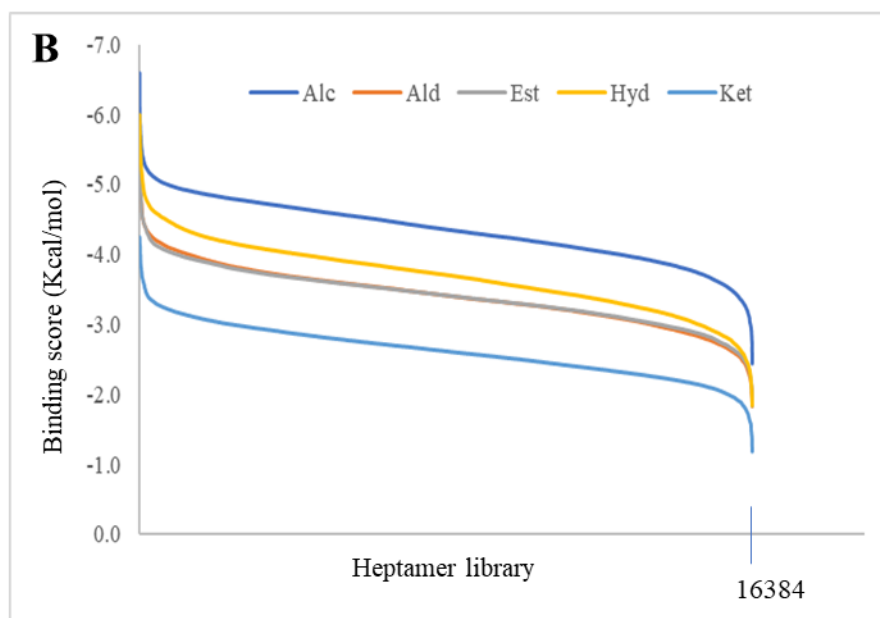

**Figure S1.** (A) Statistical summary (maximum, minimum, median and average) of the binding score calculated using ssDNA pentamer, hexamer (Mascini et al. 2019) and heptamer libraries toward the five chemical classes tested. The score values were calculated using chemgauss4 scoring function, thus lower values represented higher ssDNA–ligand affinity. (B) The binding score trend of the ssDNA heptamer library for the five chemical classes tested. The data were sorted in ascending order of score, thus not necessarily a correspondence must exist between the positions of the ssDNA in each curve.

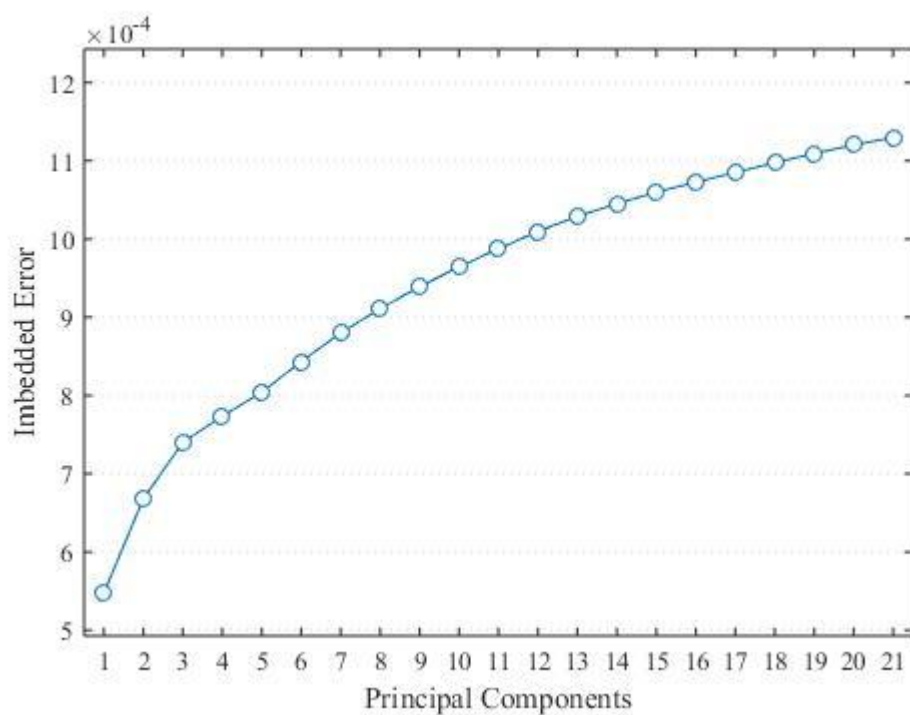

**Figure S2.** The imbedded Error calculated from the “Optimal number of Principal Components” toolbox [23] obtained from the matrix of 16384 rows (the ssDNA heptamer library) and 55 columns (the 50 VOCs plus the average of the five chemical classes).

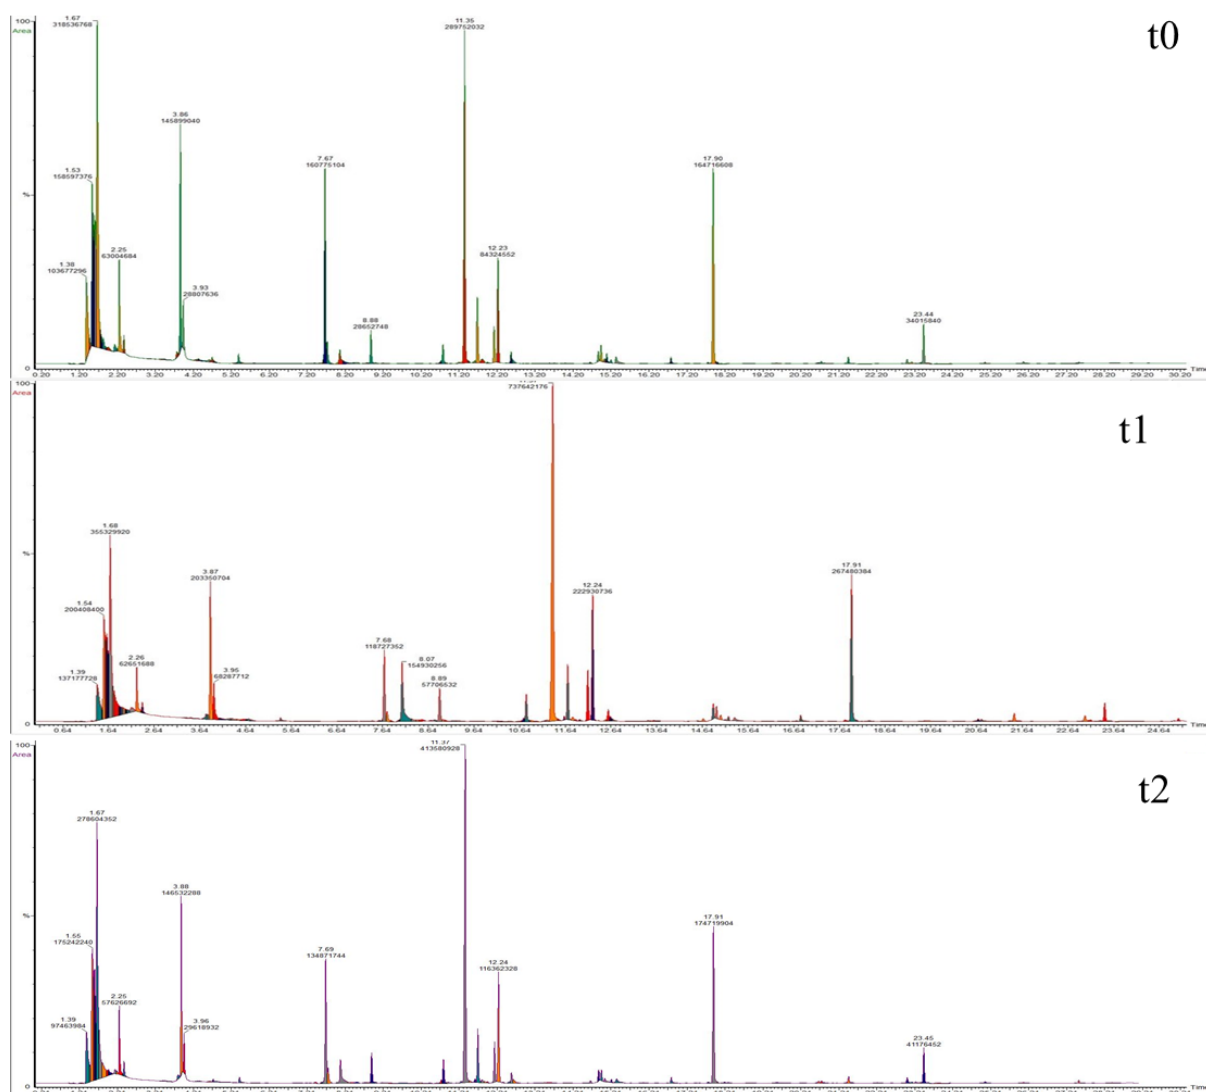

**Figure S1.** The three different chromatograms of beer fermentation for comparison among the aroma profiles. The chromatogram at time zero of fermentation (t0; raw beer), the chromatogram after 20 days of fermentation (t1), and the chromatogram after 40 days of fermentation (t2).

**Table S1.** The 50 volatile organic compounds (VOCs) belonging to five chemical classes (12 alcohols, 13 aldehydes, 17 esters, 5 hydrocarbons and 3 ketones) used as the targets to calculate the binding score values of the ssDNA heptamer library. Name, functional group, label, molecular weight, polar surface area and hydrophobicity (LogP) are also reported.

| Name                                             | Functional group | Label | MW  | PSA | LogP  |
|--------------------------------------------------|------------------|-------|-----|-----|-------|
| (1S,2R,5R)-2-isopropyl-5-methyl-cyclohexanol     | Alcohol          | A1    | 156 | 20  | 3.2   |
| (2S)-propane-1,2-diol                            | Alcohol          | A2    | 76  | 40  | -1.34 |
| (2Z)-3,7-dimethylocta-2,6-dien-1-ol              | Alcohol          | A3    | 154 | 20  | 3.28  |
| (3R)-3,7-dimethylocta-1,6-dien-3-ol              | Alcohol          | A4    | 154 | 20  | 3.28  |
| (3R,6Z)-3,7,11-trimethyldodeca-1,6,10-trien-3-ol | Alcohol          | A5    | 222 | 20  | 4.39  |
| (3S)-3,7-dimethyloct-6-en-1-ol                   | Alcohol          | A6    | 156 | 20  | 2.75  |
| (3S)-oct-1-en-3-ol                               | Alcohol          | A7    | 128 | 20  | 2.11  |
| (4S,4ar,8ar)-4,8a-dimethyldecalin-4a-ol          | Alcohol          | A8    | 182 | 20  | 3.11  |
| 3-methylbutan-1-ol                               | Alcohol          | A9    | 88  | 20  | 1.16  |
| Ethanol                                          | Alcohol          | A10   | 46  | 20  | -0.16 |
| Hex-3-en-1-ol                                    | Alcohol          | A11   | 100 | 20  | 0.75  |
| Hexan-1-ol                                       | Alcohol          | A12   | 102 | 20  | 1.85  |
| (2E,6Z)-nona-2,6-dienal                          | Aldehyde         | D1    | 138 | 17  | 2.48  |
| (2S)-2-methylbutanal                             | Aldehyde         | D2    | 86  | 17  | 1.23  |
| (2Z)-3,7-dimethylocta-2,6-dienal                 | Aldehyde         | D3    | 156 | 17  | 2.87  |
| (3S)-3,7-dimethyloct-6-enal                      | Aldehyde         | D4    | 154 | 17  | 3.48  |
| (E)-non-2-enal                                   | Aldehyde         | D5    | 140 | 17  | 3.17  |
| (Z)-hex-3-enal                                   | Aldehyde         | D6    | 98  | 17  | 1.54  |
| 2-methylpropanal                                 | Aldehyde         | D7    | 72  | 17  | 1.2   |
| 3-methylbutanal                                  | Aldehyde         | D8    | 86  | 17  | 1.31  |
| Acetaldehyde                                     | Aldehyde         | D9    | 44  | 17  | -0.16 |
| Decanal                                          | Aldehyde         | D10   | 156 | 17  | 3.97  |
| Hexanal                                          | Aldehyde         | D11   | 100 | 17  | 1.76  |
| Nonanal                                          | Aldehyde         | D12   | 142 | 17  | 3.38  |
| Octanal                                          | Aldehyde         | D13   | 128 | 17  | 2.89  |
| 5-methylhexanoate                                | Ester            | E1    | 158 | 26  | 2.37  |
| Ethyl(2S)-2-methylbutanoate                      | Ester            | E2    | 116 | 26  | 1.2   |
| Ethyl3-methylbutanoate                           | Ester            | E3    | 158 | 26  | 2.23  |
| Ethyl acetate                                    | Ester            | E4    | 88  | 26  | 0.54  |
| Ethyl butanoate                                  | Ester            | E5    | 116 | 26  | 1.39  |
| Ethyl hexanoate                                  | Ester            | E6    | 144 | 26  | 2.82  |
| Ethyl octanoate                                  | Ester            | E7    | 172 | 26  | 3.37  |
| Ethyl propanoate                                 | Ester            | E8    | 102 | 26  | 1.21  |
| Hexyl acetate                                    | Ester            | E9    | 114 | 26  | 2.83  |
| Isopentyl acetate                                | Ester            | E10   | 130 | 26  | 2.21  |
| Methyl acetate                                   | Ester            | E11   | 74  | 26  | 0.18  |
| Methyl butanoate                                 | Ester            | E12   | 102 | 26  | 1.24  |
| Methyl methanoate                                | Ester            | E13   | 61  | 26  | 0.42  |
| Methyl propanoate                                | Ester            | E14   | 88  | 26  | 0.71  |
| Octyl acetate                                    | Ester            | E15   | 172 | 26  | 3.9   |
| Pentyl butanoate                                 | Ester            | E16   | 158 | 26  | 2.51  |
| Pentyl pentanoate                                | Ester            | E17   | 172 | 26  | 2.91  |
| (4S)-1,4-dimethylcyclohexene                     | Hydrocarbon      | H1    | 110 | 0   | 4.23  |
| (4S)-4-isopropenyl-1-methyl-cyclohexene          | Hydrocarbon      | H2    | 136 | 0   | 4.45  |
| 4-isopropylidene-1-methyl-cyclohexene            | Hydrocarbon      | H3    | 136 | 0   | 4.67  |
| 7-methyl-3-methylene-octa-1,6-diene              | Hydrocarbon      | H4    | 136 | 0   | 4.58  |
| Hexane                                           | Hydrocarbon      | H5    | 86  | 0   | 3.55  |
| (1S,4S)-1,7,7-trimethyl norbornane-2-one         | Ketone           | K1    | 152 | 17  | 2.20  |
| Acetone                                          | Ketone           | K2    | 58  | 17  | 0.26  |
| Butane-2,3-dione                                 | Ketone           | K3    | 86  | 34  | -0.18 |

**Table S1.** Inter-day variability for hpDNA based E-Nose. The frequency shift ( $\Delta F$  in Hz) response of the hpDNA gas sensors with heptamer loops was obtained using 15 pure VOCs (5 alcohols, 3 aldehydes, 3 esters, 1 ketone, and 3 hydrocarbons) tested by using N<sub>2</sub> as carrier gas directly in the measuring chamber. The standard deviation was calculated using three measurements taken in 3 different days.

| VOCs                                    | AATCAGC    | CCCTGTC    | CCGATT     | GCGAAGG     | GTCCCTA    | GTCCGTT    |
|-----------------------------------------|------------|------------|------------|-------------|------------|------------|
| <b>Ethanol</b>                          | 82 $\pm$ 9 | 23 $\pm$ 8 | 91 $\pm$ 5 | 18 $\pm$ 4  | 36 $\pm$ 6 | 11 $\pm$ 1 |
| <b>1-pentanol</b>                       | 21 $\pm$ 9 | 9 $\pm$ 4  | 49 $\pm$ 6 | 12 $\pm$ 8  | 19 $\pm$ 3 | 3 $\pm$ 1  |
| <b>1-hexanol</b>                        | 23 $\pm$ 8 | 5 $\pm$ 2  | 54 $\pm$ 6 | 7 $\pm$ 4   | 11 $\pm$ 1 | 3 $\pm$ 3  |
| <b><math>\alpha</math>-terpineol</b>    | 25 $\pm$ 2 | 8 $\pm$ 4  | 62 $\pm$ 9 | 12 $\pm$ 12 | 19 $\pm$ 7 | 3 $\pm$ 1  |
| <b>Linalool</b>                         | 16 $\pm$ 9 | 6 $\pm$ 5  | 48 $\pm$ 3 | 7 $\pm$ 4   | 14 $\pm$ 8 | 18 $\pm$ 3 |
| <b>Hexanal</b>                          | 21 $\pm$ 7 | 20 $\pm$ 6 | 66 $\pm$ 3 | 14 $\pm$ 4  | 41 $\pm$ 2 | 6 $\pm$ 5  |
| <b>Octanal</b>                          | 22 $\pm$ 9 | 27 $\pm$ 3 | 64 $\pm$ 4 | 14 $\pm$ 5  | 47 $\pm$ 6 | 4 $\pm$ 2  |
| <b>Nonanal</b>                          | 44 $\pm$ 5 | 20 $\pm$ 3 | 72 $\pm$ 4 | 18 $\pm$ 5  | 47 $\pm$ 6 | 3 $\pm$ 2  |
| <b>Ethyl acetate</b>                    | 47 $\pm$ 9 | 40 $\pm$ 5 | 77 $\pm$ 8 | 29 $\pm$ 6  | 86 $\pm$ 3 | 7 $\pm$ 4  |
| <b>Ethyl-2-methylbutyrate</b>           | 45 $\pm$ 6 | 31 $\pm$ 8 | 53 $\pm$ 9 | 29 $\pm$ 3  | 82 $\pm$ 4 | 14 $\pm$ 2 |
| <b>Ethyl octanoate</b>                  | 46 $\pm$ 8 | 37 $\pm$ 3 | 77 $\pm$ 6 | 28 $\pm$ 4  | 83 $\pm$ 7 | 7 $\pm$ 5  |
| <b>Butane-2,3-dione</b>                 | 36 $\pm$ 7 | 38 $\pm$ 3 | 94 $\pm$ 6 | 25 $\pm$ 5  | 73 $\pm$ 8 | 4 $\pm$ 9  |
| <b><math>\beta</math>-caryophyllene</b> | 6 $\pm$ 2  | 14 $\pm$ 3 | 53 $\pm$ 4 | 14 $\pm$ 5  | 25 $\pm$ 2 | 2 $\pm$ 1  |
| <b>O-cymene</b>                         | 9 $\pm$ 2  | 15 $\pm$ 8 | 59 $\pm$ 6 | 15 $\pm$ 1  | 13 $\pm$ 7 | 4 $\pm$ 3  |
| <b>Terpinolene</b>                      | 12 $\pm$ 6 | 11 $\pm$ 8 | 60 $\pm$ 4 | 11 $\pm$ 9  | 8 $\pm$ 4  | 2 $\pm$ 2  |

**Table S2.** Relative concentrations of the 23 VOCs identified by SPME/GC-MS analysis in beer samples at time zero of fermentation (t0; raw beer), after 20 days of fermentation (t1) and after 40 days of fermentation (t2). Data were expressed as percentage of the total GC area. The VOCs were sorted in descending order of the average concentration. Av = average and CV = coefficient of variation of the five beer samples at three different fermentation times (t0, t1 and t2).

| VOC                             | At0  | Bt0  | Ct0  | Dt0  | Et0  | Av   | CV (%) | At1  | Bt1  | Ct1  | Dt1  | Et1  | Av   | CV (%) | At2  | Bt2  | Ct2  | Dt2  | Et2  | Av   | CV (%) |
|---------------------------------|------|------|------|------|------|------|--------|------|------|------|------|------|------|--------|------|------|------|------|------|------|--------|
| (-)- $\beta$ -Pinene            | 28.2 | 24.8 | 21.3 | 30.3 | 30.2 | 27.0 | 14.3   | 19.4 | 24.9 | 33.1 | 24.0 | 24.6 | 25.2 | 19.7   | 18.9 | 28.1 | 26.4 | 15.7 | 18.5 | 21.5 | 25.1   |
| Methylhydrazine                 | 16.0 | 13.0 | 19.2 | 25.2 | 14.5 | 17.6 | 27.6   | 17.3 | 13.7 | 14.9 | 15.7 | 15.2 | 15.4 | 8.6    | 20.5 | 13.8 | 18.2 | 19.0 | 14.9 | 17.3 | 16.4   |
| Ethyl octanoate                 | 7.9  | 8.5  | 8.9  | 8.1  | 9.1  | 8.5  | 6.0    | 9.8  | 11.8 | 14.4 | 12.0 | 13.7 | 12.3 | 14.7   | 10.8 | 14.6 | 6.9  | 11.5 | 10.5 | 10.8 | 25.3   |
| 3-Methylbutan-1-ol              | 4.0  | 7.1  | 8.0  | 11.7 | 7.2  | 7.6  | 36.2   | 8.3  | 8.0  | 7.8  | 8.7  | 9.7  | 8.5  | 8.8    | 9.4  | 8.4  | 9.0  | 9.8  | 9.3  | 9.2  | 5.5    |
| Ethanol                         | 7.0  | 6.1  | 7.8  | 6.8  | 7.3  | 7.0  | 8.8    | 8.7  | 3.6  | 9.4  | 7.3  | 11.6 | 8.1  | 36.6   | 5.0  | 7.5  | 9.9  | 7.3  | 11.9 | 8.3  | 31.4   |
| 3-Methylbutyl isobutyrate       | 3.0  | 2.6  | 6.1  | 7.3  | 8.1  | 5.4  | 46.2   | 2.1  | 2.7  | 6.2  | 2.8  | 2.7  | 3.3  | 49.8   | 1.9  | 2.6  | 1.1  | 1.9  | 2.6  | 2.0  | 31.7   |
| Isopentyl acetate               | 5.1  | 4.1  | 4.2  | 4.7  | 4.7  | 4.5  | 9.3    | 7.2  | 8.0  | 7.2  | 8.5  | 8.4  | 7.9  | 8.1    | 10.4 | 11.4 | 7.2  | 9.7  | 9.1  | 9.5  | 16.5   |
| Carbon dioxide                  | 3.8  | 3.6  | 5.3  | 4.9  | 5.0  | 4.5  | 17.6   | 5.2  | 5.1  | 5.2  | 4.5  | 5.2  | 5.0  | 5.9    | 6.7  | 7.0  | 4.8  | 6.7  | 4.6  | 5.9  | 19.6   |
| 2-Methylbutyl isobutyrate       | 8.5  | 7.3  | 0.6  | 4.0  | 0.9  | 4.3  | 83.8   | 5.7  | 7.4  | 6.2  | 7.4  | 7.2  | 6.8  | 11.9   | 5.5  | 7.5  | 3.1  | 5.0  | 6.0  | 5.4  | 29.9   |
| 2-Methylbutyl propionate        | 2.2  | 1.0  | 2.4  | 5.9  | 6.9  | 3.7  | 69.5   | 2.0  | 1.0  | 2.1  | 0.9  | 2.0  | 1.6  | 37.2   | 3.0  | 3.0  | 2.0  | 3.0  | 3.0  | 2.8  | 16.5   |
| Styrene                         | 3.4  | 4.7  | 4.6  | 2.2  | 2.1  | 3.4  | 37.0   | 1.2  | 1.2  | 1.2  | 4.6  | 5.4  | 2.7  | 79.2   | 1.0  | 1.0  | 1.0  | 1.1  | 1.2  | 1.1  | 7.9    |
| 2-Methyl-1-butanol              | 1.9  | 7.7  | 1.6  | 2.3  | 2.5  | 3.2  | 78.8   | 1.7  | 1.6  | 1.6  | 0.4  | 0.4  | 1.1  | 61.8   | 1.9  | 1.9  | 1.9  | 2.0  | 1.9  | 1.9  | 2.2    |
| Ethyl Acetate                   | 3.3  | 2.6  | 3.4  | 3.9  | 2.3  | 3.1  | 21.1   | 3.2  | 3.0  | 3.1  | 3.0  | 3.7  | 3.2  | 9.5    | 2.6  | 6.7  | 4.0  | 3.9  | 4.1  | 4.2  | 35.4   |
| Ethyl butanoate                 | 0.4  | 3.0  | 0.2  | 6.0  | 4.3  | 2.8  | 89.9   | 0.3  | 0.4  | 0.3  | 0.3  | 0.2  | 0.3  | 26.5   | 2.0  | 1.6  | 0.4  | 0.6  | 0.6  | 1.0  | 69.2   |
| Ethyl caproate                  | 2.0  | 1.0  | 2.2  | 2.6  | 3.1  | 2.2  | 35.8   | 3.1  | 3.7  | 2.3  | 2.9  | 3.2  | 3.0  | 17.3   | 3.5  | 3.1  | 2.1  | 3.3  | 3.3  | 3.1  | 18.8   |
| Isobutyl isobutyrate            | 2.4  | 1.9  | 1.7  | 1.9  | 1.8  | 1.9  | 14.2   | 1.6  | 2.0  | 1.8  | 2.2  | 1.1  | 1.7  | 25.2   | 1.9  | 1.9  | 1.1  | 1.5  | 1.9  | 1.6  | 21.7   |
| Ethyl decanoate                 | 1.6  | 0.9  | 0.9  | 1.6  | 3.0  | 1.6  | 54.1   | 2.9  | 2.9  | 2.8  | 2.6  | 2.8  | 2.8  | 3.6    | 2.2  | 4.2  | 0.1  | 2.3  | 1.7  | 2.1  | 69.5   |
| 3-Methylbutyl 2-methylbutanoate | 0.3  | 0.2  | 1.3  | 1.3  | 1.7  | 1.0  | 68.0   | 0.2  | 0.2  | 0.5  | 0.3  | 1.1  | 0.5  | 80.5   | 1.0  | 1.0  | 0.2  | 1.0  | 1.0  | 0.8  | 40.4   |
| 2-Methylpropan-1-ol             | 0.9  | 0.9  | 0.7  | 0.9  | 0.6  | 0.8  | 15.8   | 0.9  | 0.6  | 0.7  | 0.0  | 0.2  | 0.5  | 76.1   | 1.3  | 1.3  | 1.3  | 1.3  | 1.3  | 1.3  | 0.0    |
| Humulene                        | 0.5  | 0.4  | 0.2  | 1.2  | 1.0  | 0.7  | 61.7   | 0.2  | 0.1  | 0.2  | 0.2  | 0.2  | 0.2  | 39.8   | 1.0  | 1.0  | 0.2  | 1.0  | 1.0  | 0.8  | 41.4   |
| 1-Pentylisovalerate             | 0.2  | 0.2  | 1.0  | 0.6  | 1.2  | 0.6  | 70.8   | 0.2  | 0.6  | 0.9  | 1.0  | 0.2  | 0.6  | 71.3   | 2.0  | 2.0  | 2.0  | 2.0  | 2.0  | 2.0  | 0.0    |
| 2-Phenylethan-1-ol              | 0.8  | 0.5  | 1.0  | 0.1  | 0.2  | 0.5  | 79.4   | 0.5  | 0.5  | 2.2  | 0.5  | 2.9  | 1.3  | 85.5   | 2.0  | 2.0  | 2.0  | 2.0  | 2.0  | 2.0  | 0.0    |
| 3-(4-Methyl-3-pentenyl)-furan   | 0.7  | 0.7  | 0.1  | 0.3  | 0.3  | 0.4  | 61.7   | 0.0  | 0.3  | 0.2  | 0.3  | 0.3  | 0.2  | 53.6   | 2.0  | 2.0  | 1.7  | 2.0  | 2.0  | 1.9  | 7.9    |

**Table S3.** Statistical significance of single VOCs detected in the beer samples at three fermentation times (t0, t1 and t2) by using analysis of variance (ANOVA) with the Tukey HSD (honestly significant difference) multiple comparison analysis. The criterion for statistical significance of differences was p-value<0.05 for all comparisons. The parameter F was used to sort the VOCs in descending order.

| Compound                        | R <sup>2</sup> | F     | Pr > F   | t0 mean | t1 mean | t2 mean | Significant |
|---------------------------------|----------------|-------|----------|---------|---------|---------|-------------|
| 3-(4-Methyl-3-pentenyl)-furan   | 0.96           | 134.4 | < 0.0001 | 1.93    | 0.41    | 0.21    | Yes         |
| Isopentyl acetate               | 0.84           | 31.5  | < 0.0001 | 9.55    | 4.55    | 7.86    | Yes         |
| 1-Pentyl isovalerate            | 0.82           | 26.9  | < 0.0001 | 2.00    | 0.65    | 0.55    | Yes         |
| 2-Methylpropan-1-ol             | 0.74           | 16.8  | 0.000    | 1.25    | 0.80    | 0.46    | Yes         |
| Humulene                        | 0.49           | 5.8   | 0.017    | 0.84    | 0.68    | 0.19    | Yes         |
| 2-Phenylethan-1-ol              | 0.48           | 5.6   | 0.019    | 2.00    | 0.52    | 1.34    | Yes         |
| Ethyl octanoate                 | 0.46           | 5.0   | 0.026    | 10.85   | 8.52    | 12.34   | Yes         |
| 3-Methylbutyl isobutyrate       | 0.44           | 4.7   | 0.032    | 2.03    | 5.42    | 3.32    | Yes         |
| Carbon dioxide                  | 0.39           | 3.8   | 0.052    | 5.94    | 4.50    | 5.05    | No          |
| Ethyl butanoate                 | 0.38           | 3.6   | 0.059    | 1.03    | 2.79    | 0.29    | No          |
| Styrene                         | 0.37           | 3.5   | 0.063    | 1.06    | 3.39    | 2.70    | No          |
| Ethyl caproate                  | 0.35           | 3.3   | 0.073    | 3.06    | 2.16    | 3.04    | No          |
| 2-Methylbutan-1-ol              | 0.28           | 2.4   | 0.135    | 1.93    | 3.20    | 1.14    | No          |
| 2-Methylbutyl propionate        | 0.28           | 2.3   | 0.140    | 2.78    | 3.69    | 1.59    | No          |
| Ethyl Acetate                   | 0.26           | 2.2   | 0.158    | 4.23    | 3.08    | 3.21    | No          |
| Ethyl decanoate                 | 0.25           | 2.0   | 0.182    | 2.11    | 1.58    | 2.81    | No          |
| (-)- $\beta$ -Pinene            | 0.22           | 1.7   | 0.226    | 21.53   | 26.99   | 25.20   | No          |
| 3-Methylbutyl 2-methylbutanoate | 0.20           | 1.5   | 0.254    | 0.85    | 0.99    | 0.47    | No          |
| 2-Methylbutyl isobutyrate       | 0.20           | 1.5   | 0.263    | 5.42    | 4.27    | 6.80    | No          |
| 3-Methylbutan-1-ol              | 0.16           | 1.1   | 0.362    | 9.18    | 7.61    | 8.49    | No          |
| Isobutyl isobutyrate            | 0.14           | 0.9   | 0.418    | 1.65    | 1.95    | 1.73    | No          |
| Methylhydrazine                 | 0.10           | 0.7   | 0.533    | 17.29   | 17.59   | 15.36   | No          |
| Ethanol                         | 0.08           | 0.5   | 0.621    | 8.33    | 6.98    | 8.14    | No          |

**Table S4.** Frequency shift ( $\Delta F$  in Hz) response of the hpDNA gas sensors array with pentamer-hexamer loops and the hpDNA gas sensors array of with heptamer loops for the 15 beer samples (3 replicates for each sample measurement) at the three fermentation times (t0, t1 and t2) and with an intraday RSD in the 15–25% range.

|     | AAGTA                               | CCCGA | TAAGT | ATAATC | CATCTG | AATCAGC | CCCTGTC | CCGATTT | GCGAAGG | GTCCCTA | GTCCGTT |
|-----|-------------------------------------|-------|-------|--------|--------|---------|---------|---------|---------|---------|---------|
|     | Frequency shift ( $\Delta F$ in Hz) |       |       |        |        |         |         |         |         |         |         |
| Ar0 | 108                                 | 40    | 73    | 160    | 178    | 670     | 415     | 462     | 31      | 39      | 32      |
| Ar0 | 100                                 | 45    | 72    | 168    | 170    | 596     | 420     | 455     | 25      | 40      | 32      |
| Ar0 | 115                                 | 35    | 73    | 165    | 175    | 680     | 416     | 460     | 29      | 36      | 26      |
| Br0 | 118                                 | 32    | 76    | 153    | 161    | 663     | 380     | 470     | 26      | 35      | 26      |
| Br0 | 120                                 | 31    | 78    | 156    | 161    | 665     | 385     | 452     | 25      | 36      | 25      |
| Br0 | 119                                 | 36    | 75    | 153    | 162    | 642     | 390     | 460     | 24      | 40      | 28      |
| Ct0 | 115                                 | 41    | 78    | 157    | 176    | 700     | 405     | 468     | 25      | 33      | 23      |
| Ct0 | 118                                 | 40    | 75    | 158    | 178    | 750     | 405     | 468     | 26      | 31      | 25      |
| Ct0 | 115                                 | 35    | 76    | 156    | 165    | 652     | 401     | 460     | 24      | 29      | 28      |
| Dr0 | 111                                 | 34    | 81    | 169    | 177    | 687     | 393     | 457     | 23      | 31      | 27      |
| Dr0 | 111                                 | 35    | 80    | 170    | 180    | 690     | 400     | 465     | 22      | 30      | 28      |
| Dr0 | 110                                 | 36    | 75    | 170    | 175    | 685     | 401     | 452     | 21      | 29      | 29      |
| Er0 | 103                                 | 30    | 78    | 162    | 178    | 666     | 384     | 443     | 24      | 32      | 25      |
| Er0 | 102                                 | 30    | 80    | 165    | 180    | 680     | 385     | 450     | 25      | 30      | 25      |
| Er0 | 102                                 | 25    | 81    | 164    | 179    | 672     | 387     | 490     | 21      | 26      | 24      |
| At1 | 112                                 | 52    | 92    | 169    | 185    | 675     | 508     | 481     | 25      | 43      | 26      |
| At1 | 110                                 | 50    | 90    | 180    | 180    | 680     | 502     | 482     | 25      | 40      | 26      |
| At1 | 105                                 | 51    | 100   | 170    | 175    | 674     | 504     | 470     | 24      | 35      | 24      |
| Bt1 | 95                                  | 54    | 104   | 270    | 184    | 801     | 457     | 424     | 25      | 45      | 27      |
| Bt1 | 96                                  | 56    | 102   | 278    | 180    | 802     | 456     | 432     | 25      | 49      | 26      |
| Bt1 | 102                                 | 53    | 102   | 275    | 189    | 802     | 460     | 430     | 24      | 45      | 28      |
| Ct1 | 103                                 | 64    | 102   | 288    | 189    | 785     | 472     | 451     | 35      | 47      | 40      |
| Ct1 | 102                                 | 65    | 101   | 290    | 190    | 790     | 480     | 460     | 36      | 50      | 40      |
| Ct1 | 101                                 | 63    | 103   | 291    | 180    | 796     | 490     | 452     | 35      | 51      | 45      |
| Dr1 | 96                                  | 59    | 108   | 225    | 178    | 714     | 472     | 434     | 34      | 44      | 38      |
| Dr1 | 98                                  | 60    | 101   | 223    | 180    | 715     | 480     | 435     | 36      | 45      | 39      |
| Dr1 | 100                                 | 63    | 102   | 224    | 190    | 716     | 490     | 425     | 38      | 50      | 38      |
| Er1 | 114                                 | 63    | 113   | 282    | 176    | 840     | 508     | 509     | 44      | 45      | 48      |
| Er1 | 114                                 | 65    | 112   | 289    | 175    | 850     | 510     | 502     | 45      | 42      | 50      |
| Er1 | 115                                 | 63    | 116   | 256    | 179    | 835     | 506     | 503     | 30      | 45      | 51      |
| At2 | 120                                 | 46    | 92    | 181    | 173    | 610     | 361     | 477     | 36      | 45      | 38      |
| At2 | 112                                 | 45    | 100   | 182    | 175    | 612     | 362     | 475     | 35      | 46      | 38      |
| At2 | 125                                 | 43    | 95    | 183    | 174    | 610     | 365     | 480     | 36      | 48      | 37      |
| Br2 | 120                                 | 43    | 81    | 179    | 169    | 701     | 417     | 517     | 35      | 44      | 35      |
| Br2 | 120                                 | 45    | 82    | 180    | 170    | 701     | 415     | 520     | 35      | 45      | 35      |
| Br2 | 121                                 | 46    | 80    | 175    | 175    | 705     | 420     | 530     | 30      | 40      | 32      |
| Ct2 | 112                                 | 39    | 88    | 171    | 159    | 670     | 380     | 507     | 31      | 40      | 31      |
| Ct2 | 112                                 | 40    | 90    | 170    | 160    | 680     | 380     | 510     | 30      | 40      | 31      |
| Ct2 | 113                                 | 41    | 91    | 175    | 168    | 675     | 381     | 512     | 35      | 41      | 32      |
| Dr2 | 116                                 | 39    | 89    | 151    | 175    | 630     | 395     | 512     | 25      | 33      | 22      |
| Dr2 | 115                                 | 40    | 90    | 150    | 175    | 640     | 380     | 514     | 25      | 33      | 22      |
| Dr2 | 114                                 | 38    | 91    | 155    | 176    | 650     | 395     | 523     | 26      | 34      | 23      |
| Er2 | 125                                 | 45    | 76    | 168    | 158    | 739     | 403     | 512     | 25      | 34      | 27      |
| Er2 | 122                                 | 45    | 75    | 168    | 150    | 740     | 402     | 513     | 25      | 35      | 27      |
| Er2 | 123                                 | 49    | 76    | 165    | 160    | 736     | 401     | 512     | 26      | 40      | 26      |
